# Supplementary material for: Sex-specific Plasticity and the Nutritional Geometry of Insulin-Signaling Gene Expression in Drosophila Melanogaster
Source: Research Square preprint supplement (doi:10.21203/rs.3.rs-110120/v1), 2020-11-23
Supplement: Supplementary file 1 [file e04b24967df38b7455aa6658.docx]

**Supplementary Table 1: Variation in gene expression among samples within diets for male and female samples.**

|  | *4E-BP* | *InR* | *Ash2L* | *CG3071* | *dILP2* | *dILP3* | *dILP5* | *dILP8* |
| --- | --- | --- | --- | --- | --- | --- | --- | --- |
| Female  RMSEA | 0.4184 | 0.5834 | 0.5233 | 0.5070 | 0.0505 | 0.4012 | 0.7208 | 1.3167 |
| Male  RMSEA | 0.5041 | 0.6971 | 0.6720 | 0.4876 | 1.4900 | 1.2494 | 0.9775 | 1.0351 |
| *P*-ValueB | 0.2752 | 0.3739 | 0.1016 | 0.1628 | **<0.0001** | **<0.0001** | **0.0389** | **0.0018** |

A Root mean square error from the model *T = D* where *T* is expression level of gene and *D* is diet (protein and carbohydrate combination).

B *P-*value for *F* test comparing residual variance for males and female level of gene expression, after fitting the model *T = D*. Significant P-values are shown in bold
